# Supplementary material for: Tomato Sterol 22-desaturase Gene CYP710A11: Its Roles in Meloidogyne incognita Infection and Plant Stigmasterol Alteration
Source: MDPI journal article supplement (doi:10.3390/ijms232315111), 2022-12-01
Supplement: s1 [file s1]

**Table S1.** Root measurements of wt and *cyp710A11* mutant cv. Micro-Tom tomato plants infected with *Meloidogyne incognita*.

| Root features                        | Tomato plants cv. Micro-Tom           |                                       | Statistical significance |
|--------------------------------------|---------------------------------------|---------------------------------------|--------------------------|
|                                      | wt                                    | <i>cyp710a11</i>                      | p-value                  |
| Depth (mm)                           | 2523.00 ± 156.47 <sup>a</sup>         | 2078.00 ± 327.87 <sup>b</sup>         | 0.0219                   |
| Maximum width (mm)                   | 1704.40 ± 205.32 <sup>a</sup>         | 1125.00 ± 256.02 <sup>b</sup>         | 0.0028                   |
| Width-to-depth ratio (mm)            | 0.68 ± 0.07 <sup>a</sup>              | 0.55 ± 0.13 <sup>a</sup>              | 0.0770                   |
| Network area (mm <sup>2</sup> )      | 704701.20 ± 174837.71 <sup>a</sup>    | 436625.50 ± 87196.05 <sup>b</sup>     | 0.0090                   |
| Convex area (mm <sup>2</sup> )       | 2962785.60 ± 695214.03 <sup>a</sup>   | 1701601.25 ± 423038.86 <sup>b</sup>   | 0.0048                   |
| Solidity                             | 0.25 ± 0.06 <sup>a</sup>              | 0.26 ± 0.04 <sup>a</sup>              | 0.7482                   |
| Lower root area (mm <sup>2</sup> )   | 574975.00 ± 321669.14 <sup>a</sup>    | 355491.17 ± 15543.23 <sup>a</sup>     | 0.1712                   |
| Average diameter (mm)                | 14.42 ± 1.56 <sup>a</sup>             | 12.95 ± 1.65 <sup>a</sup>             | 0.1660                   |
| Median diameter (mm)                 | 10.53 ± 0.67 <sup>a</sup>             | 9.40 ± 1.03 <sup>a</sup>              | 0.0650                   |
| Maximum diameter (mm)                | 96.94 ± 13.24 <sup>a</sup>            | 78.64 ± 18.75 <sup>a</sup>            | 0.1008                   |
| Perimeter (mm)                       | 96125.98 ± 22509.65 <sup>a</sup>      | 67095.22 ± 12513.50 <sup>b</sup>      | 0.0239                   |
| Volume (mm <sup>3</sup> )            | 28037777.76 ± 9310200.21 <sup>a</sup> | 15181545.73 ± 4593999.18 <sup>b</sup> | 0.0151                   |
| Surface area (mm <sup>2</sup> )      | 4419095.53 ± 1243264.28 <sup>a</sup>  | 2684299.64 ± 561094.05 <sup>b</sup>   | 0.0130                   |
| Holes                                | 1473.60 ± 620.63 <sup>a</sup>         | 1106.50 ± 420.69 <sup>a</sup>         | 0.2729                   |
| Average hole size (mm <sup>2</sup> ) | 556.32 ± 234.24 <sup>a</sup>          | 491.27 ± 289.88 <sup>a</sup>          | 0.6964                   |
| Average root orientation (deg)       | 45.01 ± 0.86 <sup>a</sup>             | 45.54 ± 1.34 <sup>a</sup>             | 0.4667                   |
| Shallow angle frequency              | 0.32 ± 0.02 <sup>a</sup>              | 0.32 ± 0.02 <sup>a</sup>              | 0.8724                   |
| Medium angle frequency               | 0.35 ± 0.02 <sup>a</sup>              | 0.34 ± 0.01 <sup>a</sup>              | 0.1229                   |
| Steep angle frequency                | 0.33 ± 0.01 <sup>a</sup>              | 0.35 ± 0.02 <sup>a</sup>              | 0.1636                   |

RhizoVision Explorer v2.0.3 (Seethepalli and York, 2020) was used to analyze the root images using the algorithms described by Seethepalli et al. [46]. N = 5 or 6 biological replicates for wt and *cyp710a11* mutant cv. Micro-Tom tomato plants, respectively. Statistical significance was calculated using a two-tailed Student t-test. Means followed by the same letter within the same line are not significantly different ( $p > 0.05$ ).

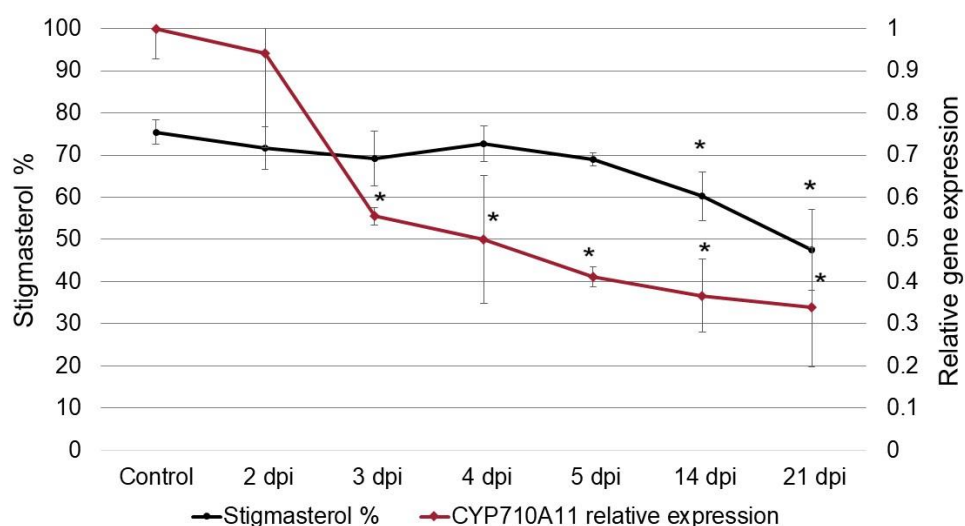

**Figure S1.** Root temporal gene expression analysis of the tomato cv. Moneymaker C-22 desaturase gene *CYP710A11* and the relative stigmasterol concentration compared to the overall free sterol composition in percentage of the uninfected control plants, at 2, 3, 4, 5, 14 and 21 days post inoculation with *Meloidogyne incognita* (dpi). N = 4 biological replicates of 2 pooled plants each per analysis. ANOVA was used for comparison of time and sterol content alterations. \*, significantly different from control with  $p < 0.05$ .

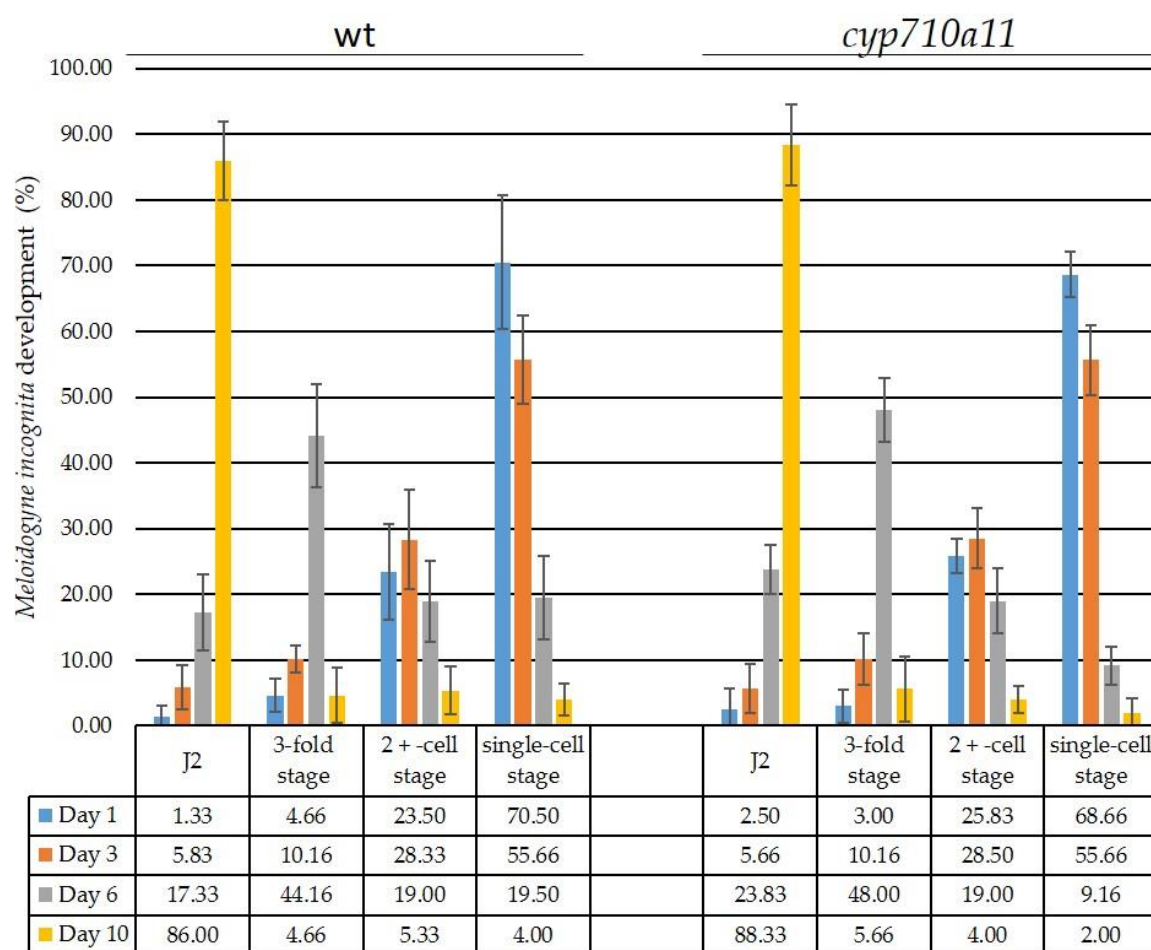

**Figure S2.** *Meloidogyne incognita* development from single-cell stage, 2 + -cell stage, 3-fold stage (pretzel stage) to second stage juvenile (J2), extracted from wt or *cyp710a11* mutant tomato plants cv. Micro-Tom, for days 1, 3, 6 and 10 presented as percentage. n = 6 biological replicates.

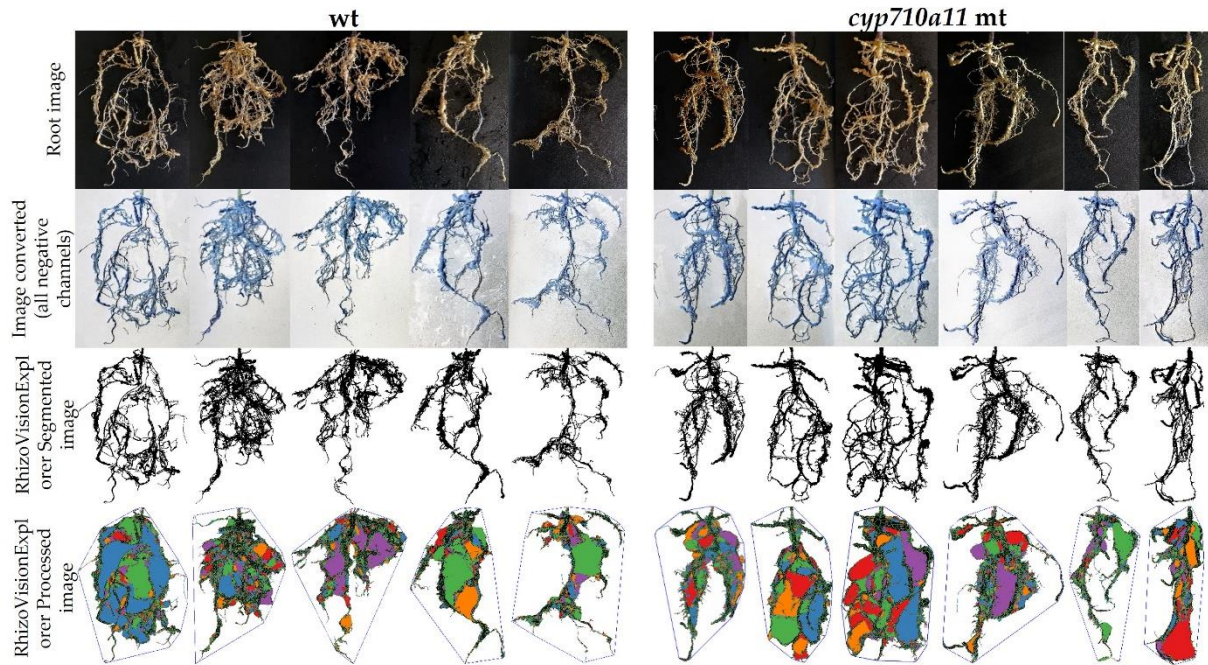

**Figure S3.** Root images from wt and *cyp710a11* mutant of cv. Micro-Tom tomato plants infected with *Meloidogyne incognita* used for root measurements (Tables 4 and S1) and its processed images created by RhizoVision Explorer v2.0.3 [19].
